# Supplementary material
Source: ML conference proceedings conference paper supplement (https://openaccess.thecvf.com/content/CVPR2026/html/Hong_CC-VQA_Conflict-_and_CVPR_2026_paper.html)
Supplement: Supplementary file 1 [file Hong_CC-VQA_Conflict-_and_CVPR_2026_supplemental.pdf]

This appendix presents additional materials and results. First, we detail our prompts in experiments in Sec. A to enhance comprehension. Then, we present additional experiments in Sec. B. Finally, qualitative results are presented in Sec. C.

## A. Prompts Details in CC-VQA

### Prompt for Parametric Context Generation:

Here is the question: **{Question}** Please describe the image about the question by your own Knowledge.

### Prompt for Disambiguated Question:

Please refer to the given image and rewrite the question so that entities and attributes are explicit, pronouns are disambiguated, and the wording is more specific. Keep the original intent and scope unchanged; do not add new information. Only output the rewritten question wrapped in `<question></question>`. Original question: **{Question}**

### Prompt for Visual Rationale Extraction:

Here is the question: **{Question}**, Here is the selected section: **{section}**, Give your answer and put the feature or reason for the answer related to the image in `<reason> </reason>`.

### Prompt for Visual-Centric Conflict Analysis:

Here is the question: **{Question}**. Below are the reasons supporting the answer derived from the retrieved information: **{Reasons text}**. Identify the key features that distinguish the aforementioned categories and extract the features that need attention in `<reason> </reason>` without detailed illustration or answer.

### Prompt for Correlation-Aware Position Encoding:

Here is the question: **{Question}**. Here is the feature to focus on: `<reason>{Features} </reason>`. Here is the retrieved information: **{Retrieved Information}**. Short Answer:

## B. Additional Experiments

### B.1. Ablation Study of Compression Ratio $\tau$

In this section, we present an ablation study on the choice of  $\tau$  in our Correlation-Aware Positional Encoding method. Specifically,  $\tau$  denotes the percentage of sentences with the lowest correlation scores selected for compression. We conducted comparative experiments on a subset of 10K samples from InfoSeek. The results demonstrate that the accuracy progressively increases as more low-correlation sentences are compressed. Based on **Observation 2** in the paper, we set  $\tau = 75\%$ , which compresses the bottom 75% of sentences ranked by correlation score during position encoding. This indicates that compressing low-correlation sentences enables the model to better focus on and utilize high-correlation sentences that are most likely to contain answers.

Table 1. Ablation of Compression Ratio  $\tau$ .

| Method        | $\tau$ | Accuracy |
|---------------|--------|----------|
| Qwen2.5-VL-7B | 25%    | 43.5     |
|               | 50%    | 44.7     |
|               | 75%    | 45.0     |

### B.2. Generalization of CC-VQA

We validated the effectiveness and generalizability of our method by testing it on large-scale KB with 100M entries using Qwen3-VL-8B. The results demonstrate that our method still achieves a significant improvement of 3.1% (47.7%  $\rightarrow$  50.8%) on a stronger model. Additionally, we evaluated the impact of retrieval size on the results. Compared to the default top-3, the method can achieve an additional 1% improvement when using top-5 retrieval.

Table 2. Generalization across Models and Retrieval Size.

| Method      | Model       | Acc. | Method | Retrieval Size | Acc. |
|-------------|-------------|------|--------|----------------|------|
| Vanilla RAG | Qwen3-VL-8B | 47.7 | CC-VQA | top-3          | 50.8 |
| CC-VQA      | Qwen3-VL-8B | 50.8 | CC-VQA | top-5          | 51.8 |

### B.3. Comparison with Thinking Model

Although CC-VQA involves multiple calls to the VLM model, each module uses the **same** model. To address concerns about test-time scaling, we compared it with different models. As shown in the table, our method achieved the highest accuracy (50.8%). Compared to using a stronger model (Qwen3-VL-8B-Thinking), our approach consumes fewer output tokens (192 vs. 817) and has lower latency (8.94s vs. 11.79s), but achieves higher accuracy. This confirms that our performance improvement stems from the proposed conflict mitigation methods.

Table 3. Comparison with Thinking Model.

| Method      | Model                | Out Tok. | Latency (s) | Acc. (%) |
|-------------|----------------------|----------|-------------|----------|
| Vanilla RAG | Qwen3-VL-8B-Instruct | 75.74    | 5.2         | 47.7     |
| Vanilla RAG | Qwen3-VL-8B-Thinking | 817.93   | 11.79       | 48.8     |
| CC-VQA      | Qwen3-VL-8B-Instruct | 192.90   | 8.94        | 50.8     |

### B.4. Inference Time

In this section, we evaluate the inference time of our method. Specifically, we select a subset of 10K samples from InfoSeek for this evaluation. As shown in Table 4, compared to the CoCoA method, our approach benefits from token compression, resulting in lower per-sample inference time. Here, “s/k” denotes the time in seconds required to process 1K samples.

Table 4. Inference Time.

| Method        | Model         | Inference Time (s/k) |
|---------------|---------------|----------------------|
| CoCoA         | Qwen2.5-VL-7B | 713.3                |
| CC-VQA (Ours) | Qwen2.5-VL-7B | 616.4                |

Compared to Wiki-PRF, our method achieves comparable latency (8.94s vs. 8.77s) with only one additional forward pass (6 vs. 5), while remaining entirely training-free. With 76 GB of A800 GPU memory usage, our CC-VQA achieves an accuracy of 45.1% on InfoSeek, demonstrating its powerful capabilities.

Table 5. Comparison with Wiki-PRF.

| Method          | Total Time | Analysis | Generation | Gen. Finetuning | Acc.(%) |
|-----------------|------------|----------|------------|-----------------|---------|
| Wiki-PRF (SOTA) | 8.77s      | 3.30s    | 5.34s      | ✓               | 42.8    |
| CC-VQA (Ours)   | 8.94s      | 4.99s    | 3.95s      | ✗               | 45.1    |

## C. Qualitative Results

### C.1. Illustration of VCCR

The key idea of VCCR is to decompose the analysis of the model and retrieval contexts into multiple fine-grained sub-tasks (e.g., extraction and comparison), thereby constructing visual conflict reasoning to enhance problem-solving accuracy. To validate its effectiveness, we conducted both manual and MLLM-based verification. The result demonstrates that decomposed subtasks maintain high accuracy, while the VCCR module ultimately achieves overall accuracy of over 84%.

Table 6. Analysis of VCCR.

| Verifier   | #Samples | Generation | Extraction | Analysis | VCCR   |
|------------|----------|------------|------------|----------|--------|
| Human      | 100      | 96%        | 77%        | 98%      | 91%    |
| MLLM-based | 10,000   | 93.87%     | 82.31%     | 95.55%   | 84.79% |

Figure 1 illustrates the score distribution across 10,000 evaluated samples. Our analysis indicates that the model’s evaluation criteria are comparatively more stringent than those employed by human annotators. Consequently, scores of 3 or higher can be reasonably interpreted as indicative of accurate assessments. This empirical distribution further substantiates the validity and methodological soundness of the proposed VCCR framework.

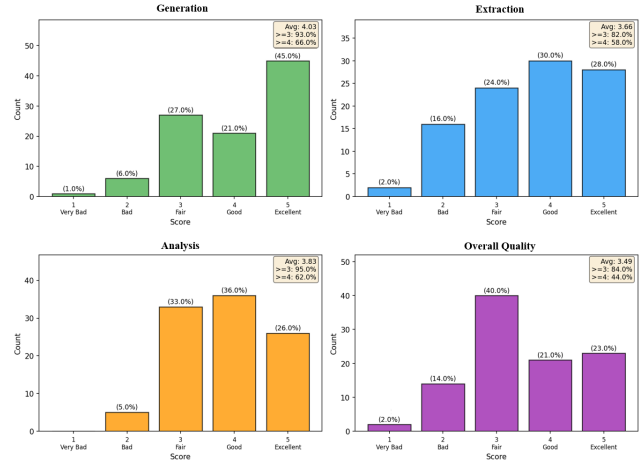

Figure 1. Distribution of MLLM-based Verification for VCCR.

Two sample-level case study of VCCR is presented in Figure 2. First, VCCR extracts parametric knowledge from the model based on visual inputs. It then executes reasoning on the retrieved data to isolate key features. In the final stage, all extracted features are consolidated to derive discriminative attributes, which serve as the basis for the ultimate reasoning process. The results demonstrate VCCR’s ability to accurately capture fine-grained visual concepts and reasoning logic.

### C.2. More Comparison Cases

In Figure 3, we present additional qualitative results of our method on Encyclopedic-VQA (E-VQA). Unlike the examples in the main text, these cases represent scenarios where both the base model and the standard RAG approach fail to produce correct answers. This further validates the effectiveness of sentence-level similarity for filtering relevant and accurate information. We specifically select three categories: animals, plants, and buildings. For each category, we show two types of questions: one indirectly related and one directly related to the image content.

In Figure 4, we present additional qualitative results of our method on Infoseek. These cases further enrich the scope of our evaluation by including examples such as the author of a jigsaw puzzle, the launch site of a rocket, and the time zone of a small town. The results demonstrate that our correlation computation effectively enhances the model’s ability to extract correct answers from retrieved information.

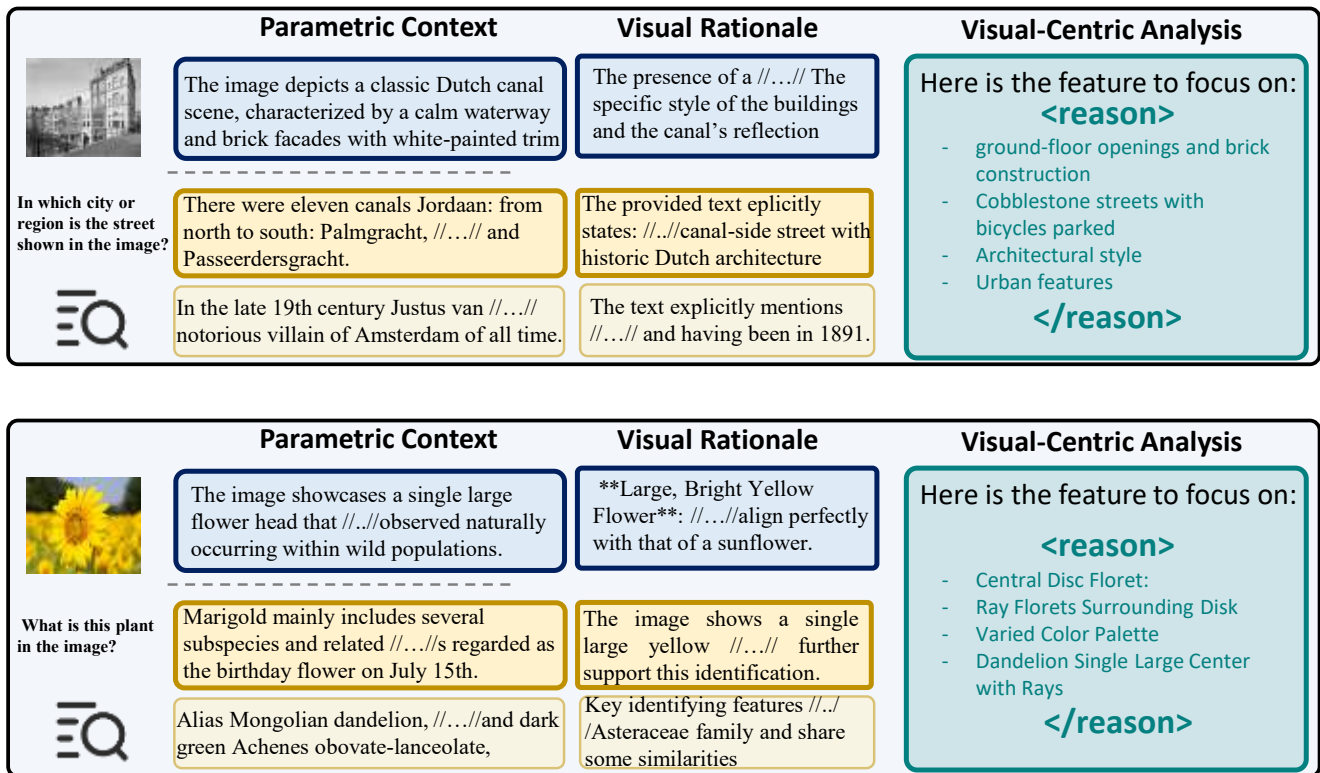

Figure 2. Detail Case of VCCR.

### C.3. Illustration of CC-VQA

In this section, we mainly show the case examples of CC-VQA. Figure 5 and Figure 6 illustrate complete inference pipelines on CC-VQA. Specifically, Figure 5 presents a location-related case from E-VQA, while Figure 6 shows a time-related case from InfoSeek.

### D. Limitations and Future Work.

One limitation of our method is its requirement for explicit externalization of model knowledge prior to performing visual-centric conflict reasoning. Ideally, after receiving external knowledge contexts, the model should implicitly identify and resolve conflicts between internal and external knowledge, necessitating robust reasoning capabilities. In future work, we will explore integrating multimodal reasoning into the KB-VQA task to further enhance response accuracy.

## E-VQA

### Animals

Along with english and maori, what is the official language of the country where this bird is known as the black shag?

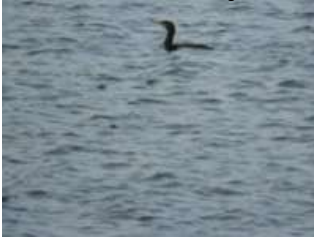

The country where the bird is known //..//one of its official languages is **Te Reo Māori**.

The bird in the picture //..//The official languages, are Maori and **Te Reo Māori**

**CC -VQA** New Zealand Sign Language

**GT** New Zealand Sign Language

Along with the call "turkatrae-turkatrae", what specific vocalization of the bird in the image was thought to indicate fine weather?

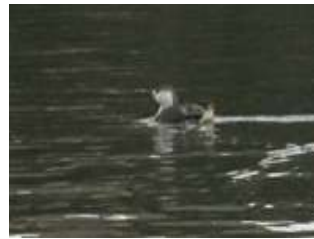

The call that was thought to indicate fine weather//..// was the "**miaow**" or **similar call**

The bird in the picture appears to //..// this bird is known as the "**sneezing**" call.

**CC -VQA** Based on the provided context, the specific vocalization is "**gaa-gaa-gaa**".

**GT** gaa-gaa-gaa

### Plants

Along with the Phoenicians, Greeks, Arabs, Syrians, Jews, and Chinese, with whom did the region where this specific plant is located, in areas adjacent to the Western Ghats, trade during the Sangam period?

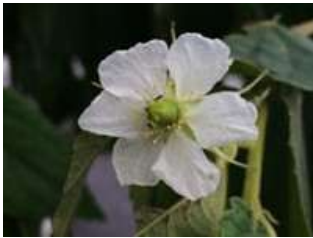

The area where this plant (Rubus armeniacus) is seen in //..//to the **Western Ghats**

Arabs, Syrians, and Chinese, the area engaged in trade with the following //..// **Indians**

**CC -VQA** Romans

**GT** Romans

Along with Chile, where does this plant grow?

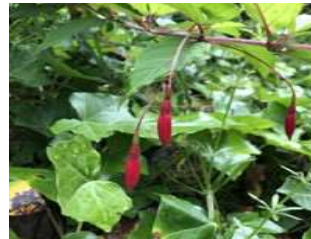

**Chile**

Fuchsias are not typically associated //..//plants are often **in gardens** for aesthetic

**CC -VQA** Along with Chile, the fuchsia plant //..//grows in **Argentina** and southern Brazil

**GT** Argentina

### Buildings

At what point in the 21st century was the colonial church at this archaeological site excavated?

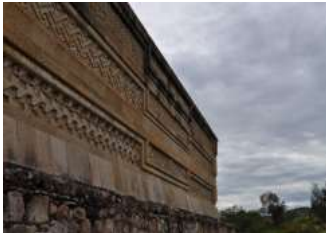

The colonial church at this archaeological site was excavated in the **16th** century

if you have a specific, please **provide more details** so I can //..//an accurate response.

**CC -VQA** The colonial church at //..//in the **start** of 21st century, beginning in 2003, While the

**GT** start

Besides fish, what other type of fauna does this lake have a lot of?

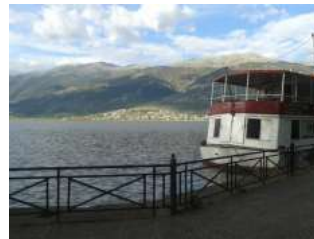

it is **not possible to determine** from the image alone how much or which types of fauna

Besides fish, the lake also has a diverse bottom fauna, including **Ochridagammarus**

**CC -VQA** It also mentions "small mammals, waterbirds and a rich fish and **crustacean** fauna

**GT** crustacean

Figure 3. **More Cases of CC-VQA on E-VQA.** Qualitative results from Encyclopedic-VQA demonstrate that our method also enhances the model's retrieval-augmented generation capabilities.

# Infoseek

## Game & Vehicle

Who is the discoverer or inventor of this game?

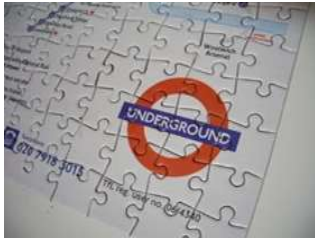

The jigsaw puzzle in the //...// which was created by **Harry Beck** in 1931

The inventor of the jigsaw puzzle is **Charles H. Spalding**

The inventor of the Jigsaw puzzle is **John Spilsbury**, a London cartographer //...//

**GT John Spilsbury**

where is the starting point of this vehicle?

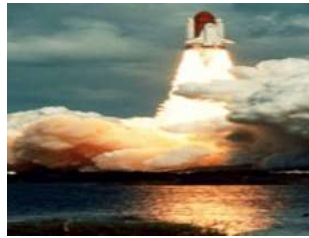

This is the primary launch site for the **Space Shuttle fleet** during its operational years

The starting point of the //...//, specifically at the **Vehicle Assembly Building**

The launch site depicted in //...// is **Launch Complex 39** at Kennedy Space Center, Florida

**GT Launch Complex 39**

## Plant & Animal

What is the closest upper taxonomy of this insect?

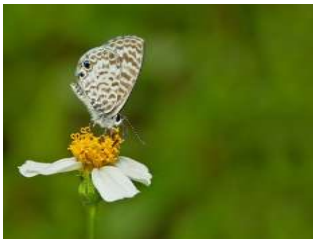

The specific species can vary greatly within //...// including **eye-spots** on the hindwings

The closest upper taxonomy of the insect in the picture is the family **Lycaenidae**

The closest upper taxonomy of the small //...// leaf in the image is the genus **Leptotes**.

**GT Zebra Blue, Leptotes**

Which place is this animal endemic to?

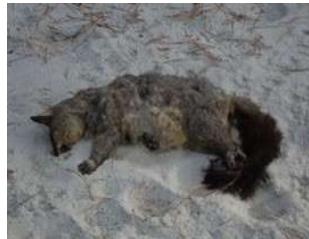

The image shows a //...// be a grey fox Grey foxes are native to **North America**

The animal in the //...// opossum (*Tlacuatzin canescens*), which is endemic to **Mexico**

The animal whose droppings are visible in the image is endemic to **Australia**.

**GT Australia**

## Landscape & Building

Which (geo)physical feature is the island located in or on?

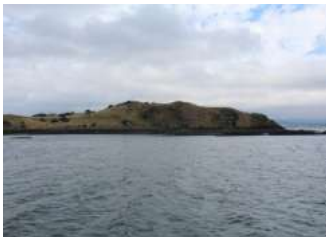

The island appears //...// presence of what looks like the **Irish Sea** in the foreground.

The island is located in the outer Firth of Clyde, which is a strait in **Scotland**

The prominent //...// is located in the Firth of Forth, which is situated in the **North Sea**.

**GT North Sea**

In which year was this town first mentioned in writing?

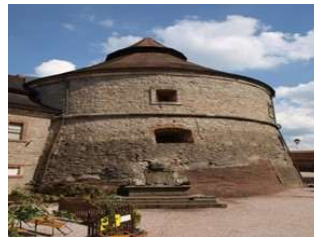

The town of Schloss Kriebstein was first mentioned in writing in the year **1269**.

The town Nymburk was first mentioned in writing in **1777**

The town of Český Krumlov was first mentioned in writing in **1254**.

**GT '1255', '1253', '1254'**

Figure 4. **More Cases of CC-VQA on Infoseek.** Qualitative results from Infoseek demonstrate that our method also enhances the model's retrieval-augmented generation capabilities.

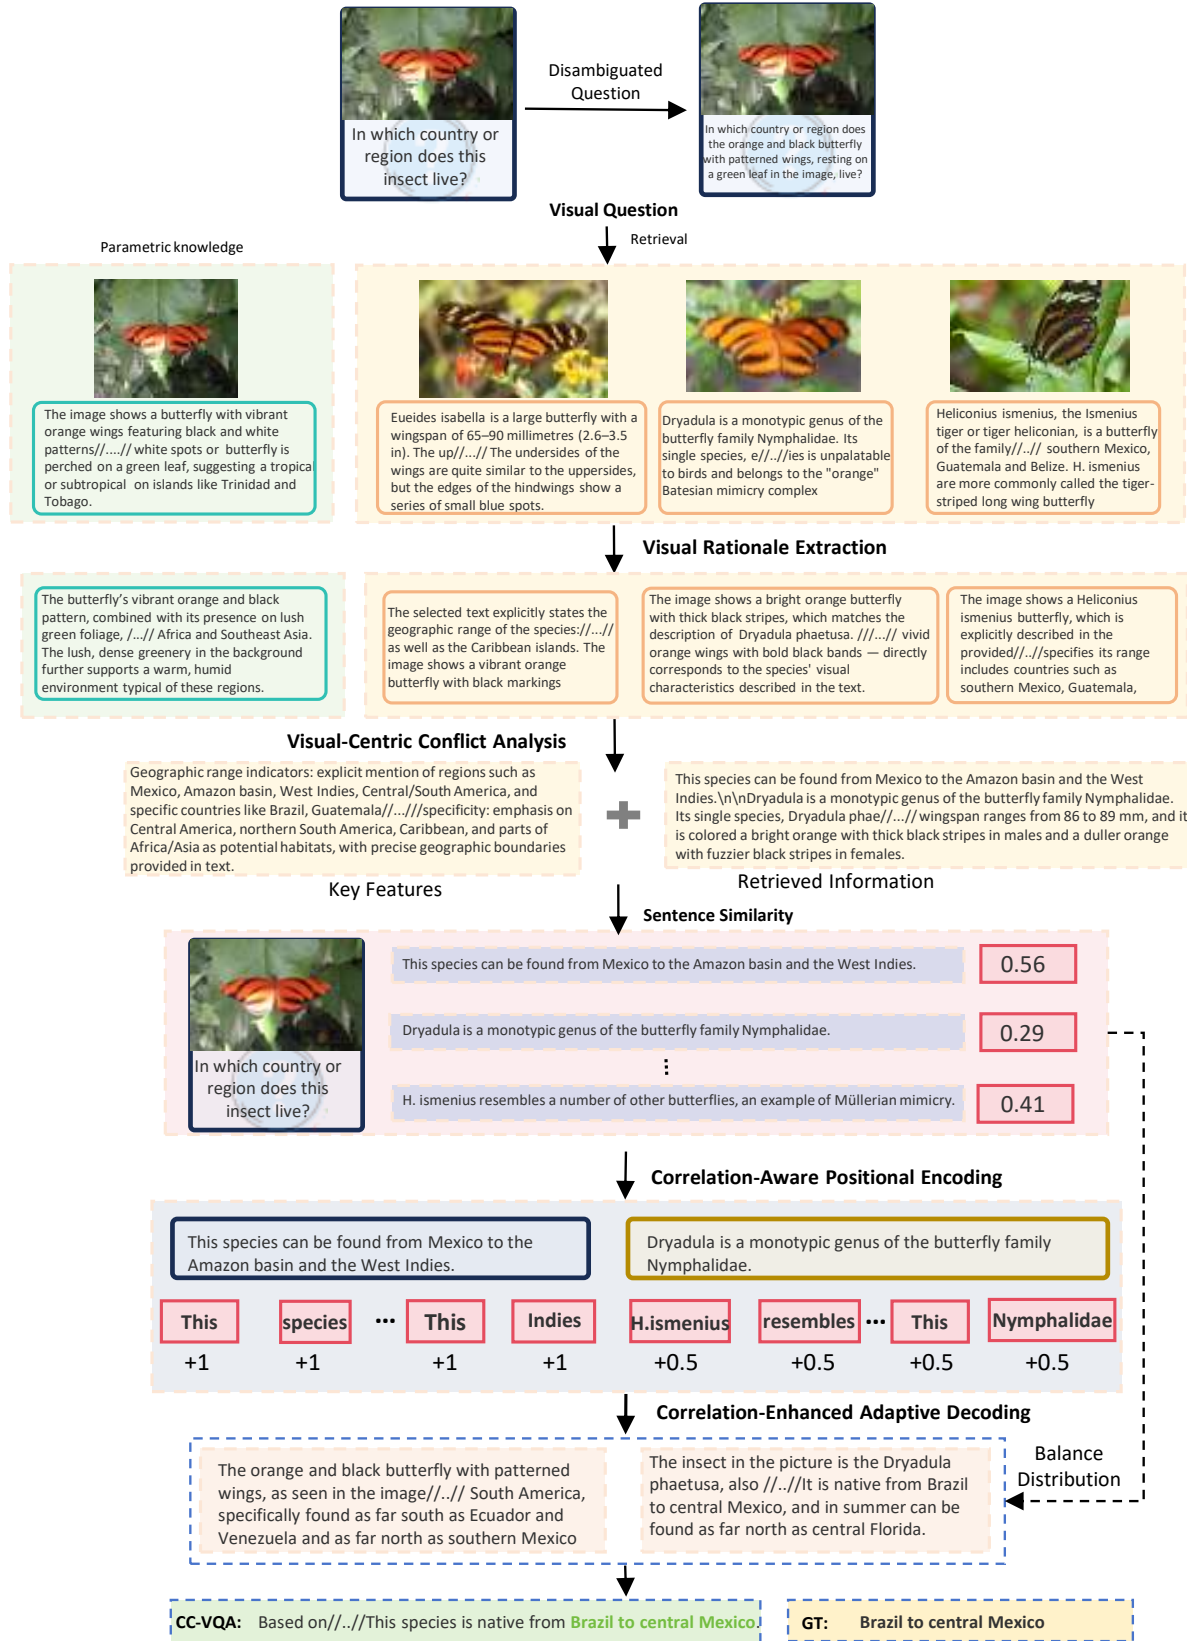

Figure 5. Illustration of CC-VQA on E-VQA.

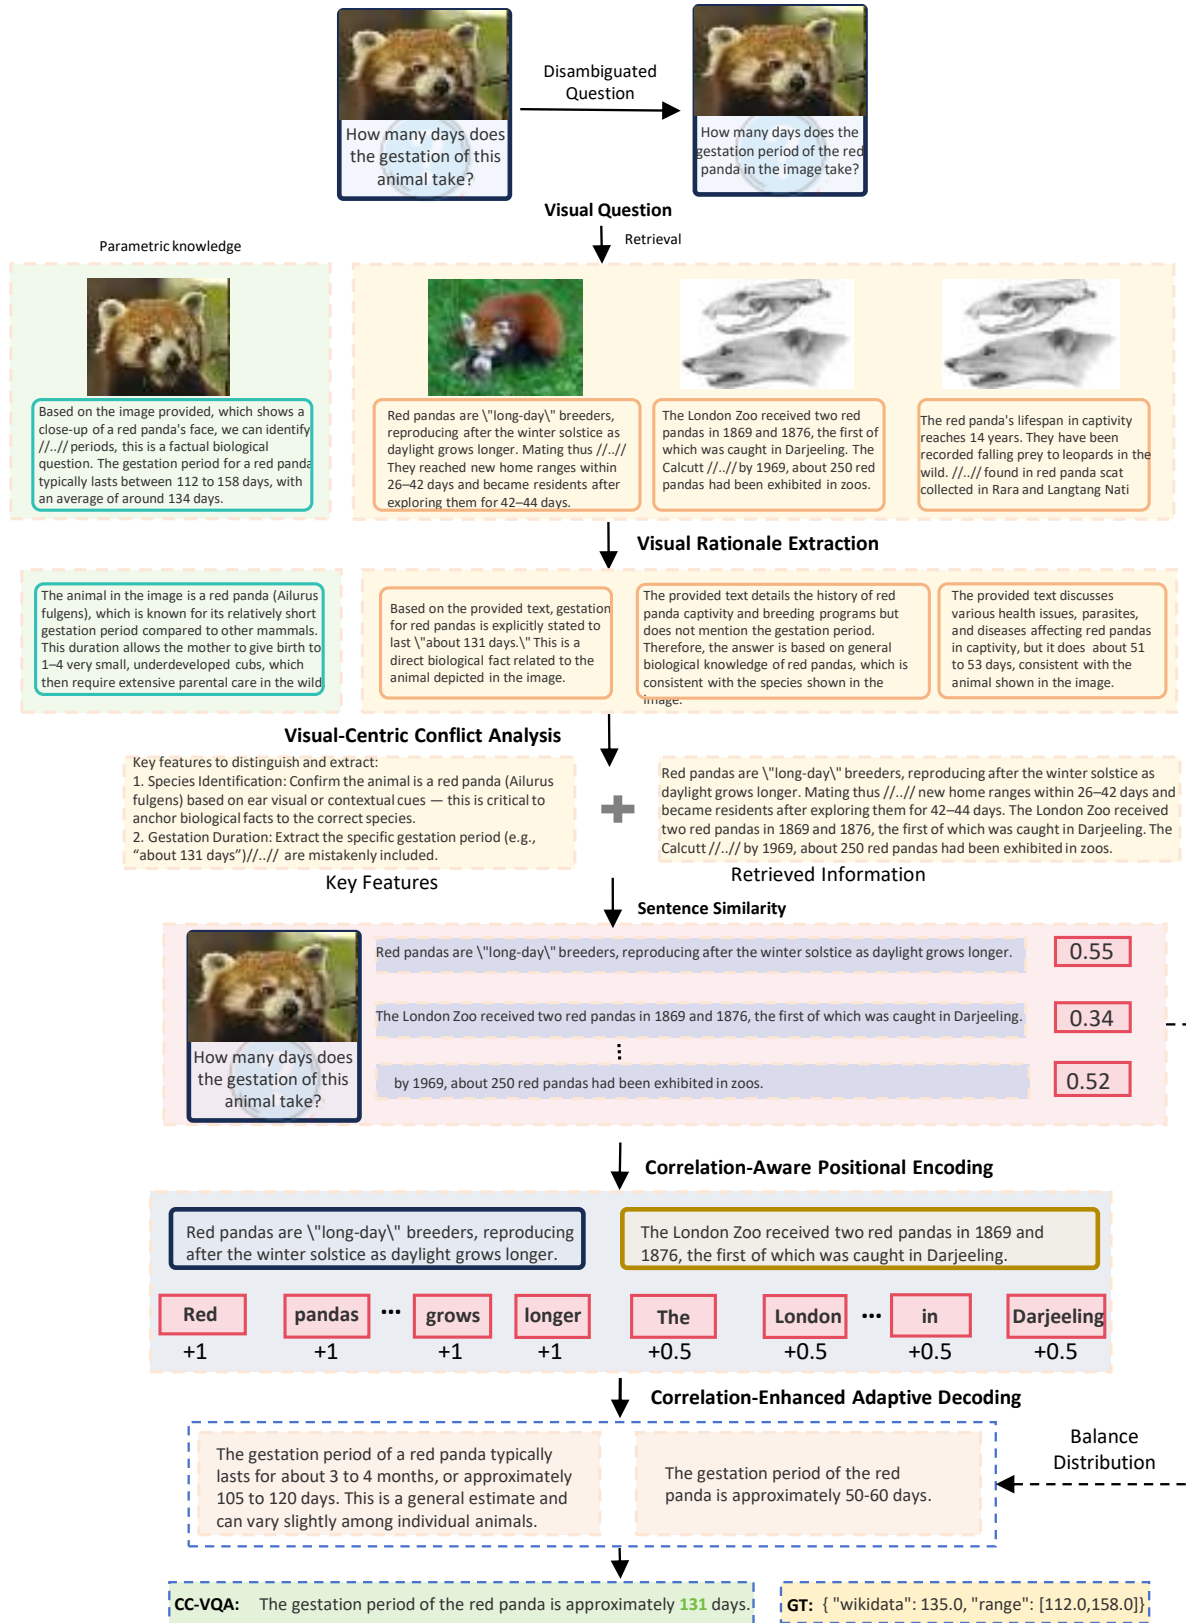

Figure 6. Illustration of CC-VQA on Infoseek.
